# Supplementary material
Source: Research Square preprint supplement (doi:10.21203/rs.3.rs-9353152/v1)
Supplement: Supplementary file 1 [file fa2a6aedde129a229e986dfb.docx]

**Listening to disorder: acoustic physical unclonable functions for audio-enabled secure authentication**

Ying-Hao Fu1,2, Zi-Ting Wang1,2, Xin-Yu Cheng1, Tao Wang1, Yu Wang1*, Yan-Qing Lu1*

1National Laboratory of Solid State Microstructures, Key Laboratory of Intelligent Optical Sensing and Manipulation, College of Engineering and Applied Sciences, and Collaborative Innovation Center of Advanced Microstructures, Nanjing University, Nanjing 210023, China.

2 These authors contributed equally: Ying-Hao Fu and Zi-Ting Wang.

*E-mail: yuwang87@nju.edu.cn, yqlu@nju.edu.cn

**Supplementary Figures**

**
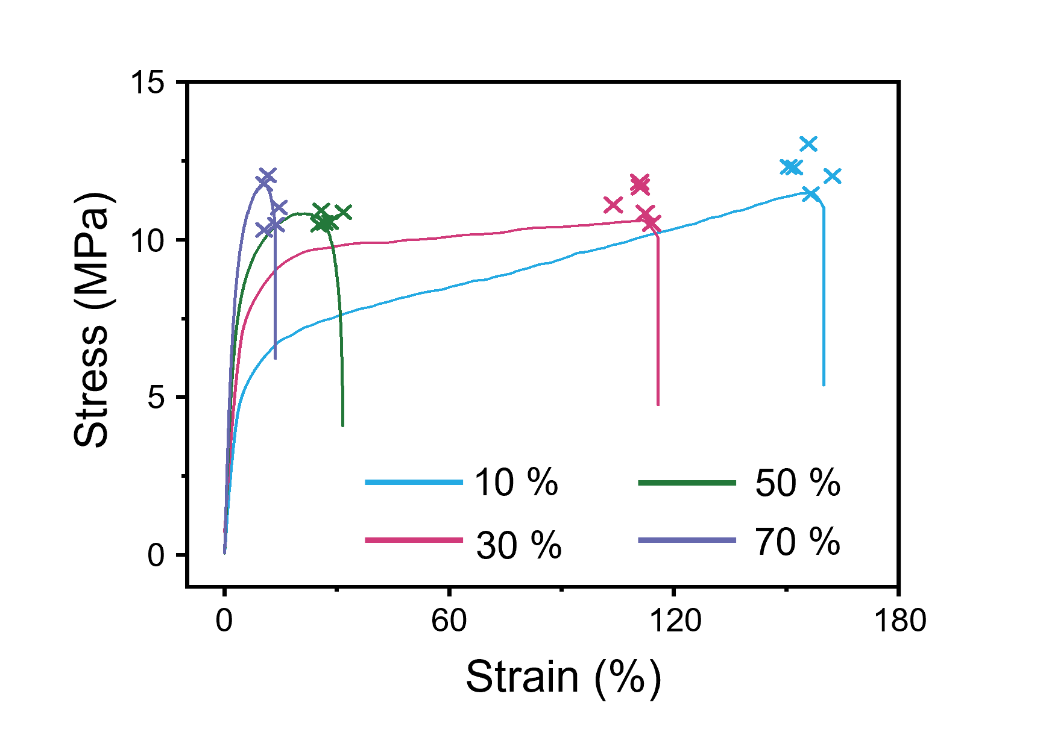
**

**Fig. S1.** Stress-strain curves of A-PUF labels with varying CrO2 contents (10-70%).

**
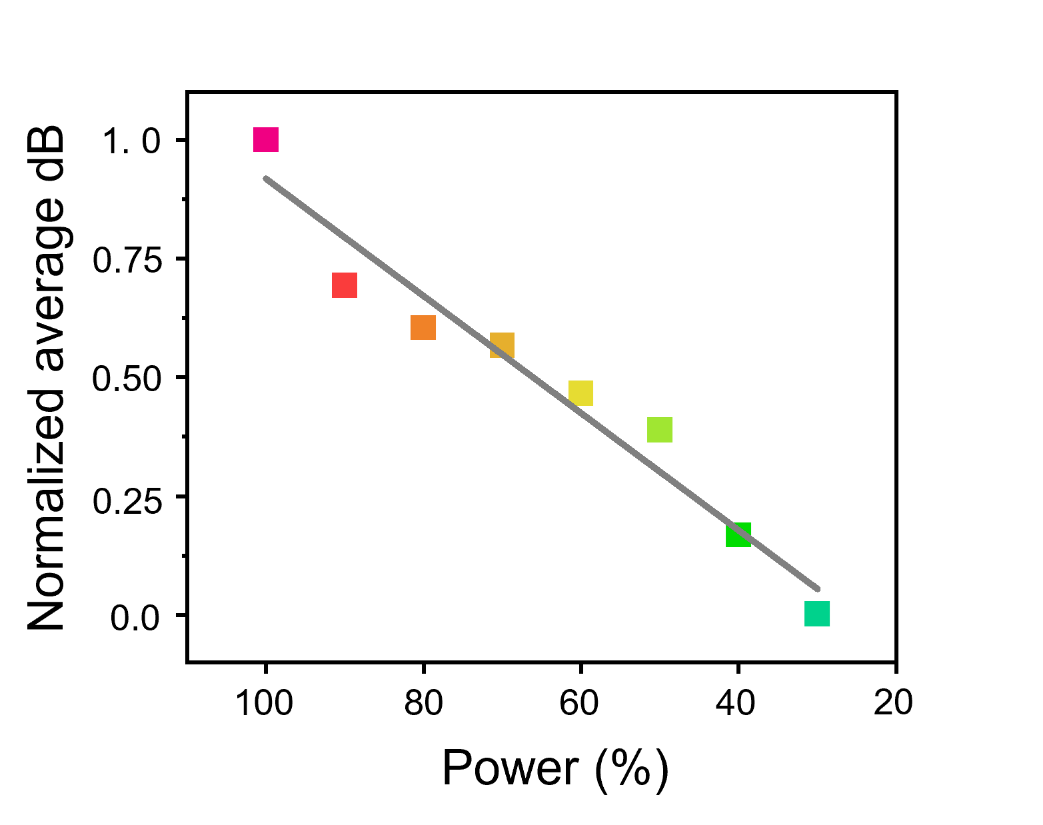
**

**Fig. S2.** Dependence of output audio loudness on input power, exhibiting a linear scaling behavior.

**
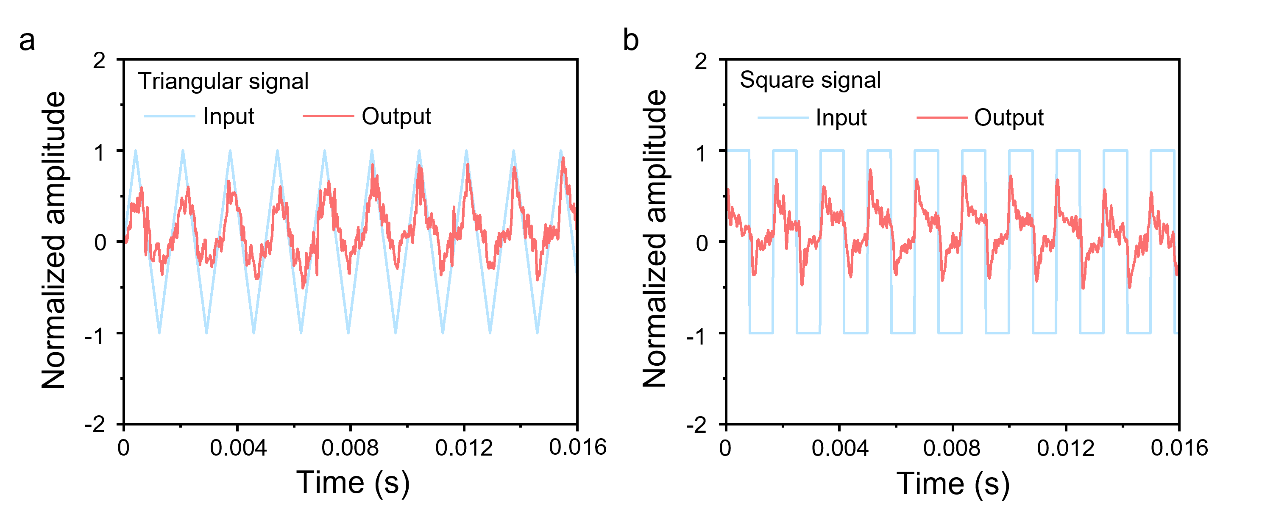
**

**Fig. S3.** Input (blue) and output (red) signals of a 600 Hz single-frequency tone applied to the A-PUF label under different driving waveforms: (a) triangular; (b) square.

**
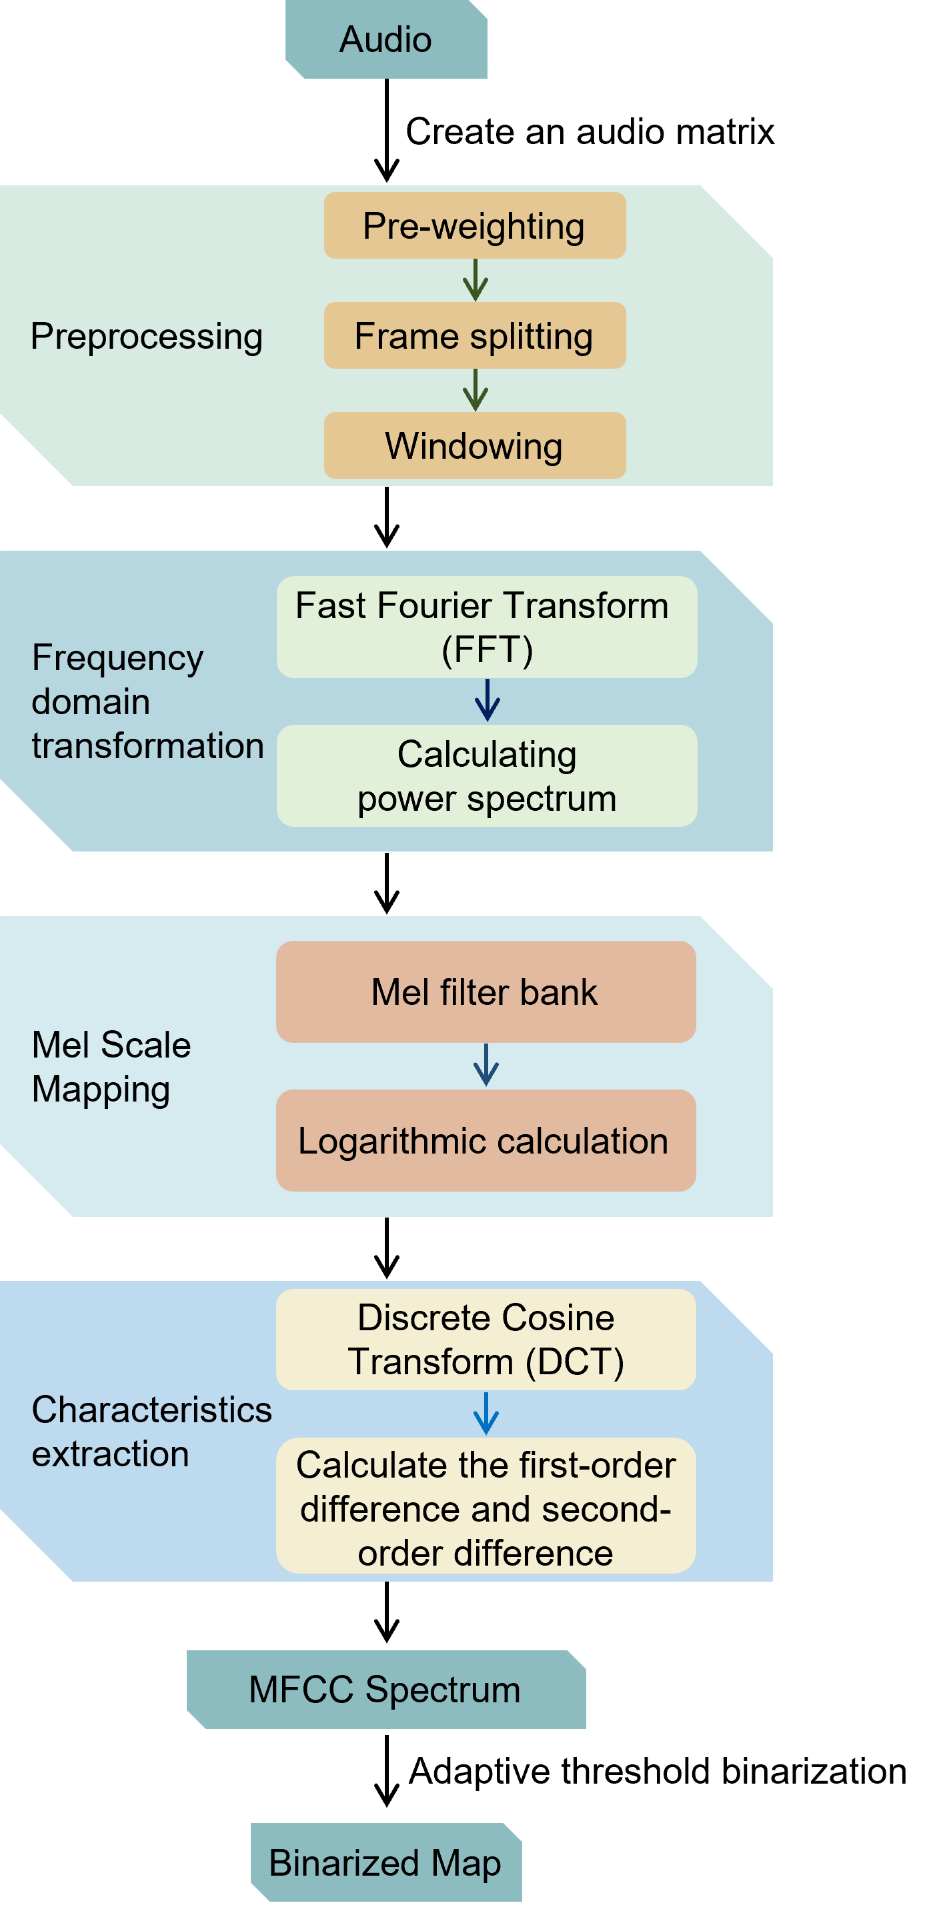
**

**Fig. S4.** Detailed flowchart of the MFCC processing pipeline for adaptive binarization.

**
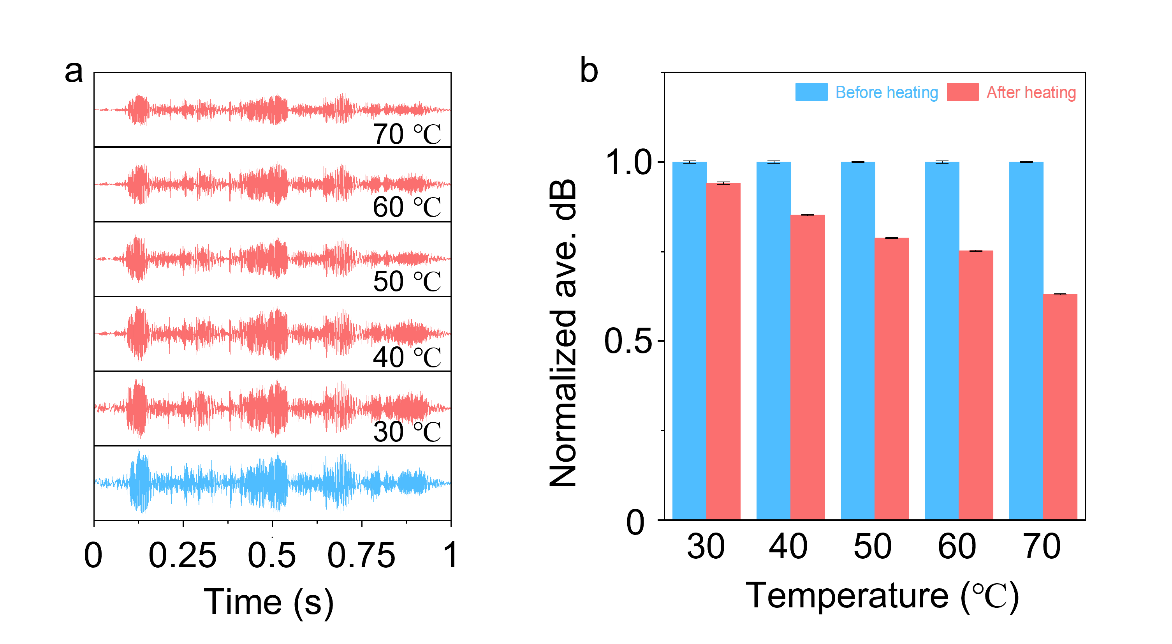
**

**Fig. S5.** Effect of thermal treatment on the output signal of the A-PUF label. (a) Audio waveforms before and after heating at different temperatures. (b) Average output loudness as a function of heating temperature, showing a gradual decrease with increasing temperature.

**
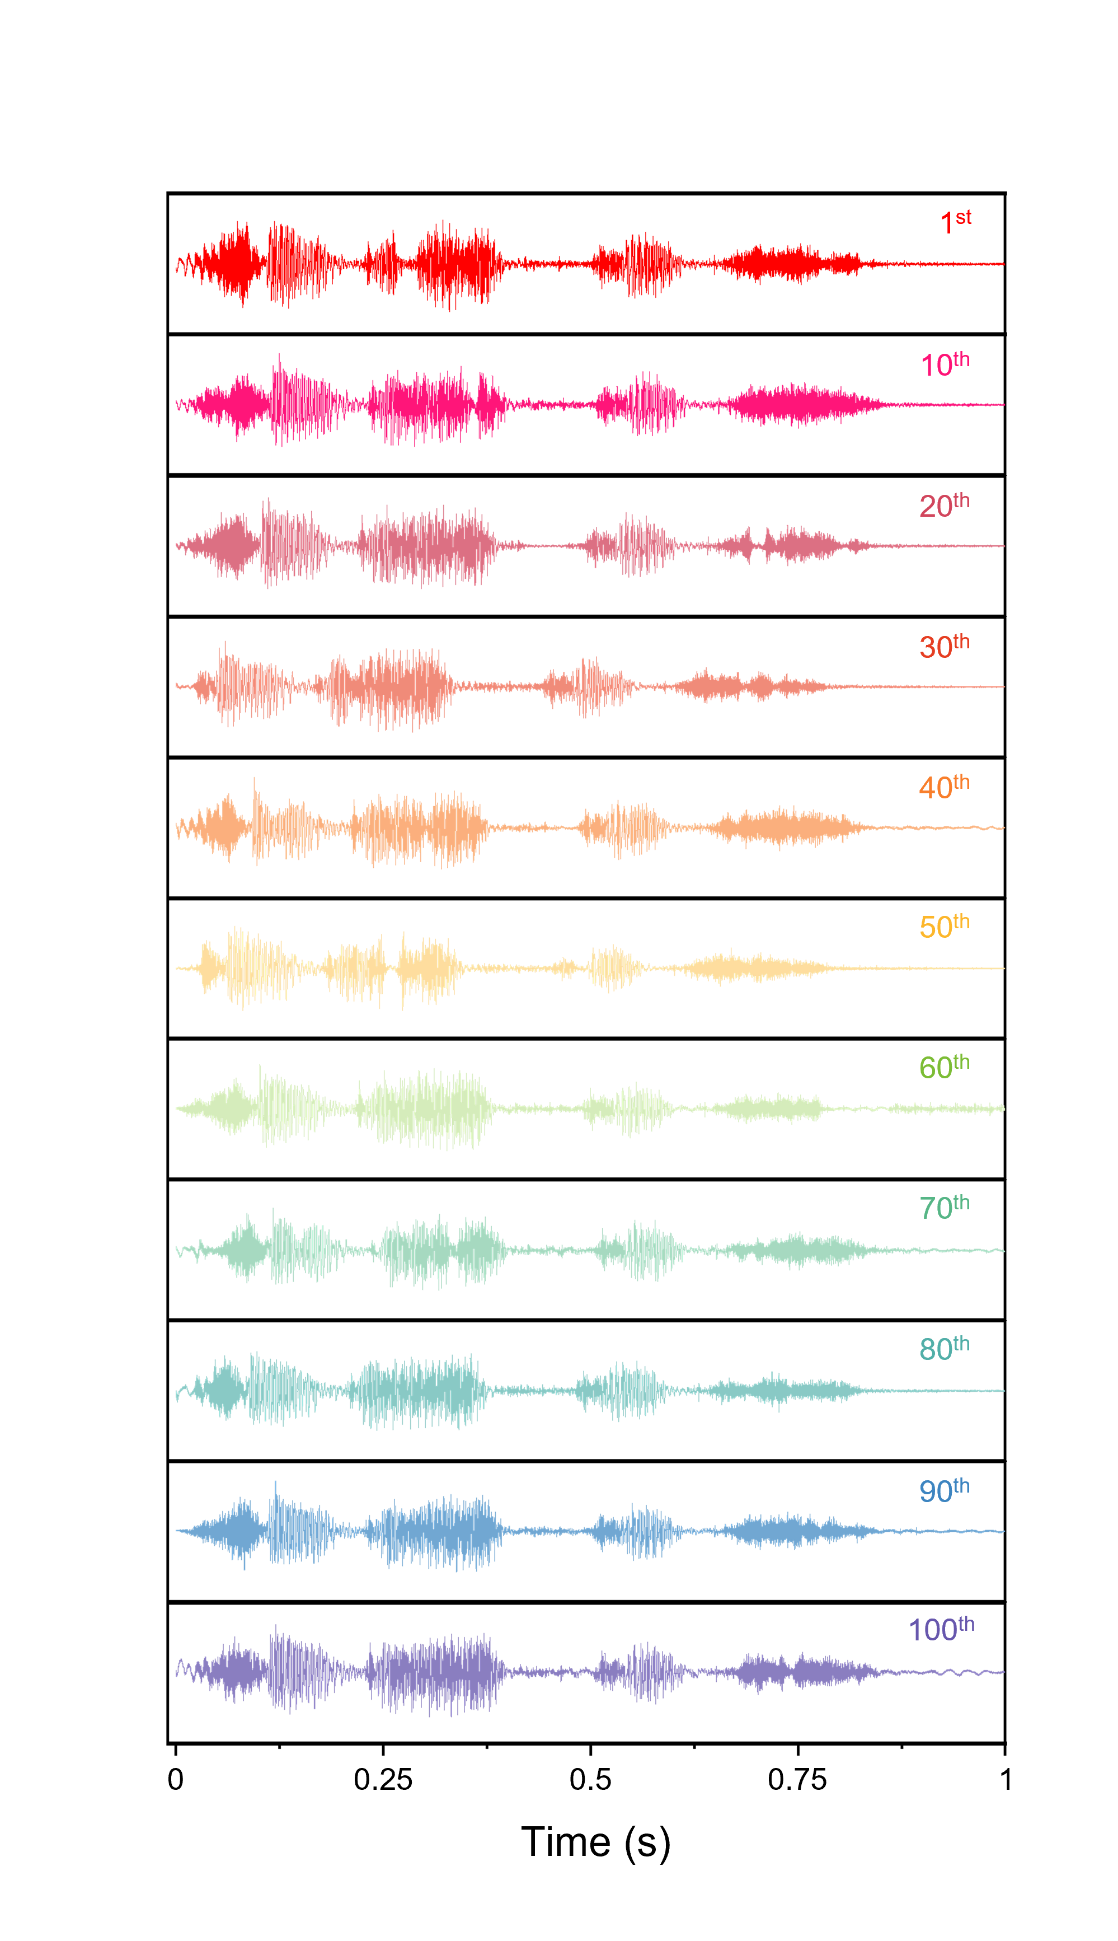
**

**Fig. S6.** Audio waveform data extracted from every tenth cycle during 100 reconfiguration tests of the A-PUF.

**
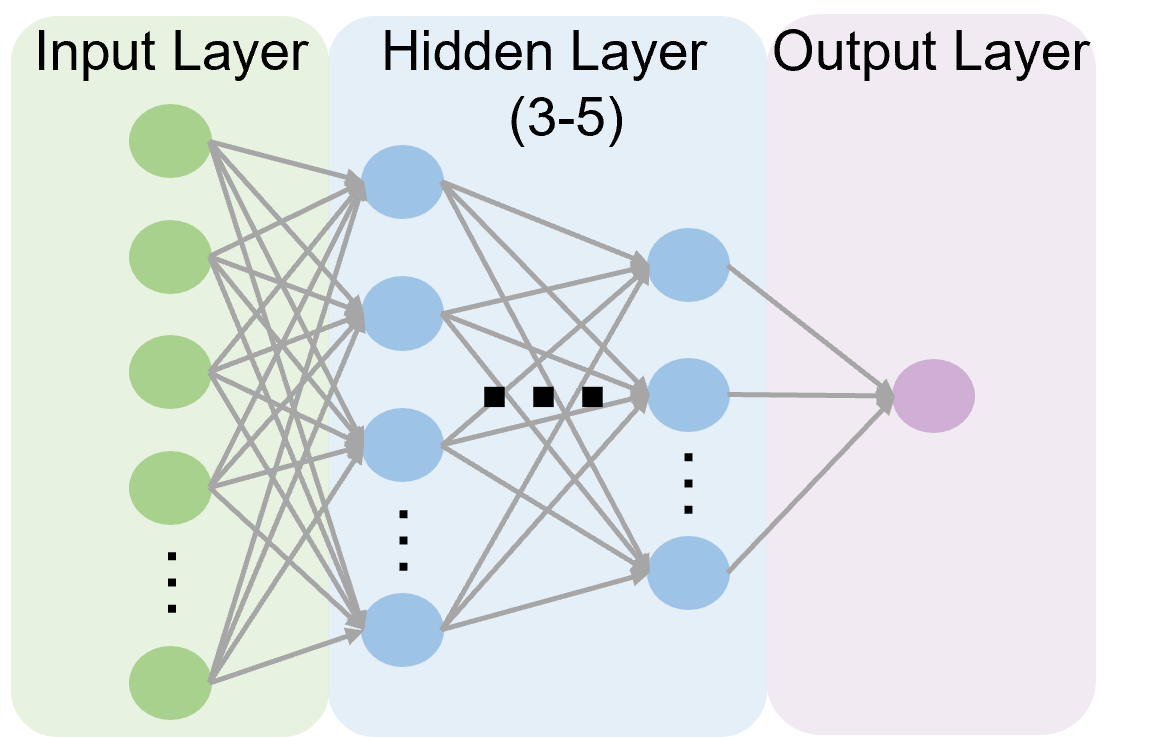
**

**Fig. S7.** Schematic illustration of the MLP architecture comprising 3-5 hidden layers.

**
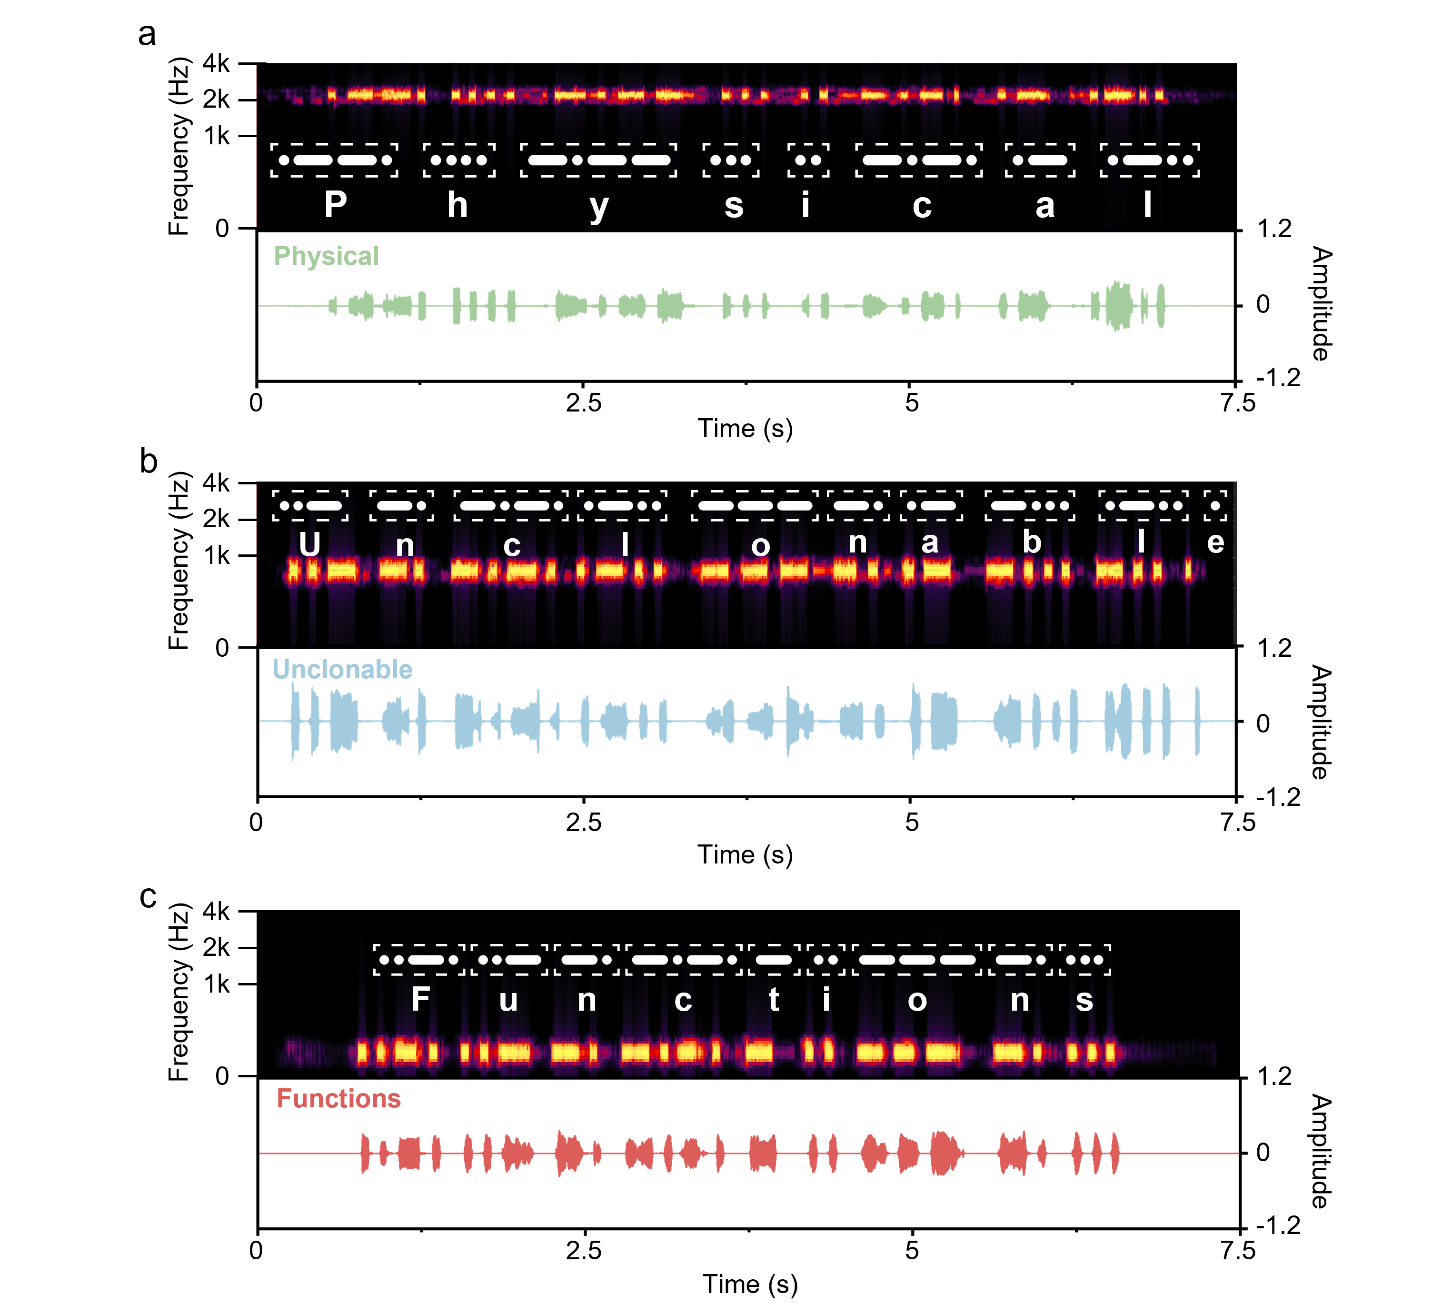
**

**Fig. S8.** Frequency-dependent encoding of Morse codes. (a) “Physical” (2800 Hz), (b) “Unclonable” (1300 Hz), and (c) “Functions” (400 Hz). Top: Mel-spectrograms; Bottom: Audio waveforms.

**
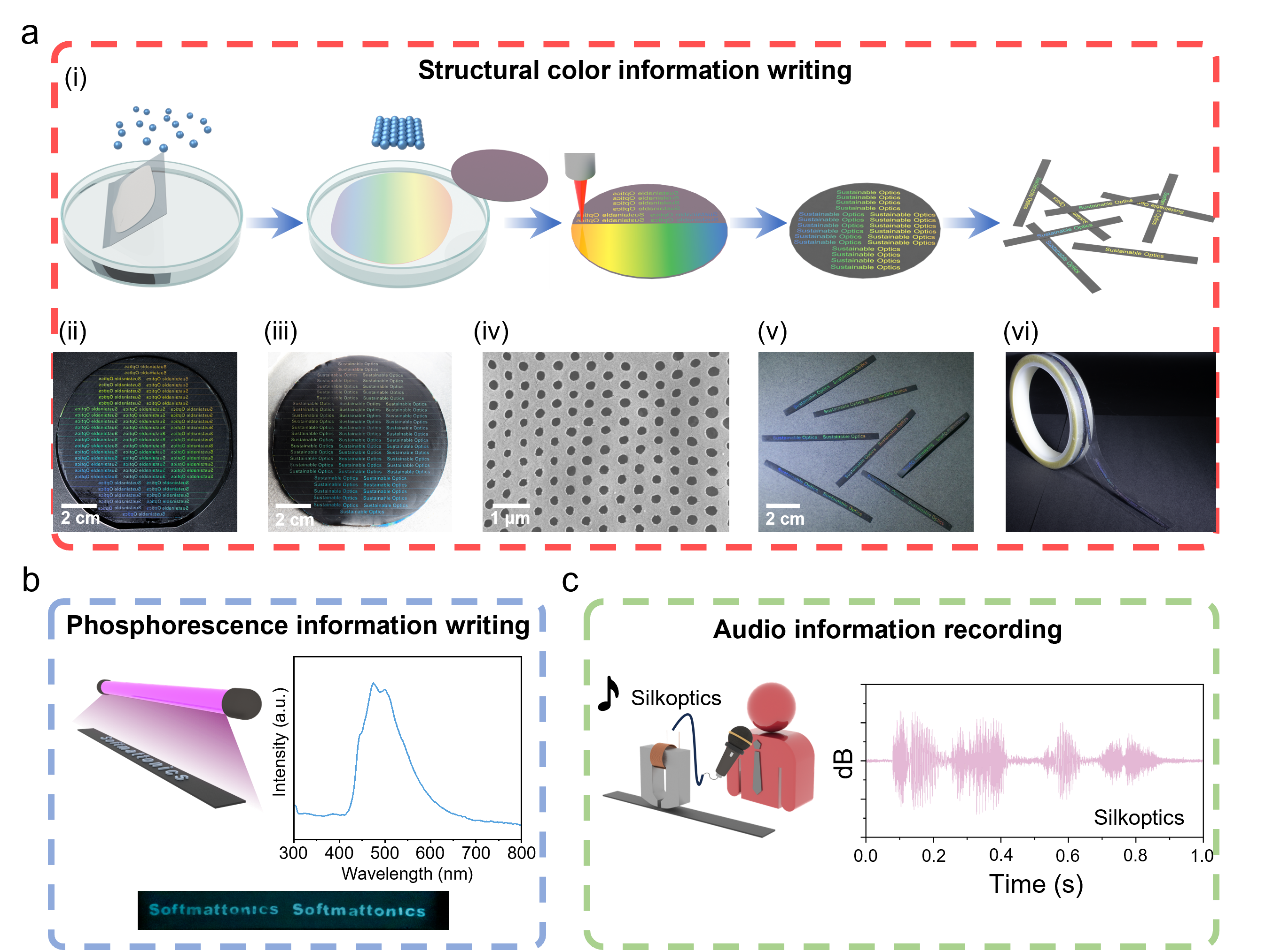
**

**Fig. S9.** Preparation of the acoustic-optical hybrid label. (a) Structural color encoding: (i) fabrication workflow; (ii) laser-engraved polystyrene colloidal crystal template; (iii) CrO2@RTP-SF film with patterned inverse-opal structures at the surface; (iv) SEM image showing highly ordered hexagonal air-cavity arrays; (v) label strips with encoded structural color; (vi) final hybrid labels integrating structural color, phosphorescence, and audio functionalities. (b) Phosphorescent encoding via mask-assisted UV exposure and the extracted pattern after cessation of illumination. Inset shows the phosphorescence spectrum. (c) Audio encoding using a cassette recorder and the corresponding waveform spectrum.

**Supplementary Table**

**Table S1.** A performance comparison between A-PUFs and mainstream optical and electrical PUFs

| **PUF types** | **A-PUFs** | **Optical PUFs** | **Electrical PUFs** |
| --- | --- | --- | --- |
| **High coding capacity** | **√** | **√** | **×** |
| **Convenient authentication** | **√** | **×** | **√** |
| **Reconfigurable** | **√** | **√** | **×** |
| **Expandable** | **√** | **√** | **×** |
| **Machine learning attack resistance** | **√** | **×** | **√** |
| **Non-single entropy source** | **√** | **×** | **×** |
| **Carrying information** | **√** | **×** | **×** |

**High coding capacity:** The total number of codes that the PUF can generate.

**Convenient authentication:** The operational simplicity and hardware accessibility of the PUF readout system.

**Reconfigurable:** The stored key can be erased and reprogrammed with a newly generated key.

**Expandable:** Expanding the key length on the same PUF device without additional hardware modifications.

**Machine learning attack resistance:** The PUF platform exhibits strong resilience against machine learning attacks.

**Non-single entropy source:** The entropy arises not only from the structural randomness of the label but also from the stochastic characteristics of the excitation signal.

**Carrying information:** The system not only encodes security PUF key but also enables the storage and transmission of human-perceptible information.

**Supplementary Note 1**

**MFCC processing and binarization**

To evaluate the authentication performance of the A-PUFs, MFCCs were extracted from the recorded audio signals to generate feature matrices representing their acoustic fingerprints. The resulting MFCC matrices were subjected to dimension-wise adaptive binarization to convert continuous features into binary keys. PUF performance metrics were subsequently calculated based on the binarized outputs. All signal processing and analyses were performed using MATLAB R2023a. Unless otherwise specified, data processing was performed using the following parameters. The specific process is as follows:

1) Preprocessing: The recorded audio signals were first converted into one-dimensional discrete time-series representations of amplitude. Each signal was preprocessed using standard speech feature extraction procedures, including pre-emphasis filtering, short-time framing, and Hamming windowing. For all experiments, 1 s audio segments sampled at 48 kHz were divided into frames with a length of 25.0 ms and a hop size of 10.0 ms, resulting in 98 overlapping frames per sample.

2) Frequency domain variation: Each frame of the preprocessed signal was transformed into the frequency domain using a fast Fourier transform (FFT) to obtain complex spectral coefficients corresponding to a specific time frame and specific frequency. The magnitude-squared spectrum was subsequently calculated to generate the frame-wise power spectrum for further feature extraction.

3) Mel Scale Mapping: Based on the perceptual frequency response of human hearing and the characteristics of the samples, the frame-wise power spectra were projected onto a Mel-scaled filter bank comprising 40 Mel filters, and set the coefficient to 40. The filter bank energies were logarithmically compressed to reduce dynamic range, yielding log-Mel spectral matrices that describe the temporal evolution of Mel-band energies.

4) Audio feature extraction: Discrete cosine transformation (DCT) was applied to the log-Mel spectral features to decorrelate the filter bank energies and produce MFCCs. The frame-wise log-energy was appended as an additional coefficient to incorporate overall signal intensity. To capture temporal dynamics, first- and second-order time derivatives were further computed for each feature dimension. After inclusion of the energy term, the static feature set comprised 41 coefficients per frame. Concatenation of the static, first-, and second-order features resulted in a final 123-dimensional MFCC feature vector for each frame, forming the MFCC matrix that characterizes the temporal evolution of acoustic timbre.

5) Binarization processing: The MFCC feature matrix was converted into binary responses to generate digital PUF keys. For each feature dimension, an adaptive threshold defined by the median value across frames was applied to perform dimension-wise binarization, assigning values above and below the threshold to binary states of 1 and 0, respectively. This procedure produced an adaptive binary MFCC matrix for each sample. PUF performance metrics, including bit uniformity, uniqueness, and repeatability, were subsequently evaluated using the resulting binary keys.

**Supplementary Note 2**

**Calculation of encoding properties of PUFs1**

1) Bit uniformity: The uniformity metric can be quantitatively assessed by using the following equation:

Bit uniformity= (1)

where represents the th bit of a sample and represents the total number of bits in the sample.

2) Hamming distance (HD): The HD measures the number of mismatched bits between two binary codes. Given two binary codes *A* and *B*, the HD can be calculated using the following formula:

HD= (2)

where both and have a length of -bits, and and represent the th bit of and , respectively.

3) Uniqueness: The uniqueness, or the average inter-HD (i.e., the variations between different PUFs under the same challenge), among a batch of samples, can be quantified using the following equation:

Uniqueness= (3)

where and represent the th and th samples respectively, with each sample consisting of -bit. represents the total number of samples in this batch.

4) Repeatability: Repeatability is calculated as the average intra-HD (i.e., the differences between identical PUFs) using the following equation:

Repeatability= (4)

where represents the total pixel number of each sample readout. represents the original -bit sample code and represents the readout of the same sample from another measurement, in which represents the number of measurements and represents the total number of measurements.

**Supplementary Note 3**

**The A-PUF label cost calculation**

The A-PUF anti-counterfeiting labels were primarily composed of SF, silica-coated CrO2, and glycerol. The materials and corresponding prices required for the fabrication of A-PUF are detailed in Table S2. Detailed procedures for SF extraction and CrO2 pretreatment are described in the Method. Briefly, raw silkworm silk was degummed using sodium carbonate to remove sericin, and the purified fibroin was subsequently dissolved in lithium bromide to obtain aqueous SF solution. Based on reagent consumption during preparation, the production of 1 g of SF required 0.86 g sodium carbonate and 2.26 g lithium bromide, corresponding to a material cost of US$0.3094 g-1.

**Table S2.** The materials and corresponding prices required for A-PUF fabrication.

| Material | Unit price | Material | Unit price |
| --- | --- | --- | --- |
| Silk cocoon | $ 14.0352/kg | Lithium bromide | $ 85.99522/kg |
| Sodium carbonate | $ 9.527/kg | Chromium dioxide | $ 2,070.857142/kg |
| TEOS | $ 17.142857/L | Glycerol | $ 41.9/kg |
| Ammonia aqueous | $ 16.89142/L | Ethyl Alcohol | $ 1.9142857/kg |

To improve aqueous dispersibility and interfacial compatibility, CrO2 particles were coated with a silica shell via a sol-gel process using TEOS in an ethanol-ammonia mixture. Treating 1 g of CrO2 consumed 50 mL TEOS, 250 mL ethanol, and 15 mL ammonia, yielding silica-coated CrO2 with a calculated cost of US$3.66 g-1.

Each standard A-PUF label (50 × 3.5 mm) had an average mass of 0.01516 g, comprising 0.00892 g SF, 0.00268 g CrO2, and 0.00356 g glycerol. Based on these compositions, the material cost per label was estimated to be approximately US$0.0127.

By normalizing the material cost to unit area, the A-PUF labels exhibit a substantially lower cost ($0.000073/mm2) than previously reported optical and electrical PUF platforms2-4.

**Supplementary Note 4**

**Model processing for machine learning attack**

The machine learning section covers multi-layer perceptron (MLP) models, Fourier regression models, and generative adversarial network (GAN) models. All machine learning processing were performed using MATLAB R2023a.

1) MFCC processing: The audio segments used in the ML analysis were sampled at a frequency of 9 kHz. MFCC processing was performed sequentially, including preprocessing, frequency-domain transformation, Mel-scale mapping, feature extraction, and binarization. During preprocessing, the audio signal was segmented into frames with a length of 25 ms and a hop size of 12 ms, resulting in 84 overlapping frames per sample. For Mel filter bank construction, the number of MFCC coefficients and filters was set to 26 and 30, respectively, while the minimum and maximum frequencies were adjusted within an appropriate range. After feature extraction and subsequent processing, a total of 81-dimensional feature vectors were obtained for each sample.

2) MLP models: The neural network model was trained using the Levenberg-Marquardt algorithm. The number of hidden layers was set to 3, 4, and 5 for comparative evaluation. The dataset was randomly divided into training (80%), validation (10%), and test (10%) sets. The learning rate was set to 0.01, and the loss function was defined as the mean squared error (MSE). The training process was terminated when the convergence criterion reached 1×10-5.

3) Fourier regression models: The harmonic order was set to 𝐾 = 200, which is less than half of the length of the sampled audio segments. The model was constructed using a randomly selected 90% subset of the data for training, with the remaining 10% used for prediction. For comparative analysis, the Fourier order was set to 50, 100, and 200, respectively. The corresponding coefficients were determined using the least-squares estimation method, and MSE was adopted as the loss function.

4) GAN models: The model was trained using a randomly selected 90% subset of the dataset, with the remaining 10% used for prediction. Both the generator and discriminator networks were configured with 3 hidden layers. The generator network comprised an input layer with 100 neurons, followed by 3 hidden layers containing 256, 512, and 1024 neurons, respectively. The generated outputs were subsequently fed as inputs to the discriminator network. The discriminator consisted of 3 hidden layers with 1024, 512, and 256 neurons, respectively, and a final output layer with a single neuron for binary classification. The model was trained for 550 epochs using the Adam optimizer with a learning rate of 1×10-5. During training, both the generator and discriminator losses fluctuate within the ideal range.

**Supplementary references**

1. Hu, Y.-W.*, et al.* Flexible and Biocompatible Physical Unclonable Function Anti-Counterfeiting Label. *Adv. Funct. Mater.* **31**, 2102108 (2021).

2. Liu, Y.*, et al.* Inkjet-printed unclonable quantum dot fluorescent anti-counterfeiting labels with artificial intelligence authentication. *Nat. Commun.* **10**, 2409 (2019).

3. Zhang, T.*, et al.* Multimodal dynamic and unclonable anti-counterfeiting using robust diamond microparticles on heterogeneous substrate. *Nat. Commun.* **14**, 2507 (2023).

4. Zheng, Y.*, et al.* Unclonable Plasmonic Security Labels Achieved by Shadow-Mask-Lithography-Assisted Self-Assembly. *Adv. Mater.* **28**, 2330-2336 (2016).
